# Supplementary material for: Machine learning immune-related gene based on KLRB1 model for predicting the prognosis and immune cell infiltration of breast cancer
Source: Frontiers journal article supplement (doi:10.3389/fendo.2023.1185799), 2023-06-07
Supplement: Data_Sheet_1.zip [file Figure supplementary .doc]

**Figure S1. Correlation between KLRB1 and breast cancer molecular typing and biomarkers.** （A）Luminal A, （B）Luminal B, （C）HER2, （D）Basal, （E-G）KLRB1 was negative correlation with ESR1, PGR and ERBB2.

**Figure S2**. **KLRB1 expression associated with chemotherapy sensitivity and immunotherapy response.** （A-D）KLRB1 low expression be more sensitive to doxorubicin, paclitaxel, docetaxel, and 5-fluorouracil. （E-H）Patients with positive PD-1 and CTLA4, positive CTLA4 or PD-1, and patients with negative PD-1 and CTLA4 have a higher sensitivity for immunotherapy with high expression of KLRB1.
